# Supplementary material for: Flurbiprofen ameliorated obesity by attenuating leptin resistance induced by endoplasmic reticulum stress
Source: PubMed Central journal article supplement (PMC3958308; doi:10.1002/emmm.201303227), 2014-01-14
Supplement: emmm0006-0335-sd1.pdf [file emmm0006-0335-sd1.pdf]

## Flurbiprofen ameliorated obesity by attenuating leptin resistance induced by endoplasmic reticulum stress

Toru Hosoi, Rie Yamaguchi, Kikuko Noji, Suguru Matsuo, Sachiko Baba, Keisuke Toyoda, Takahiro Suezawa, Takaaki Kayano, Shinpei Tanaka, and Koichiro Ozawa

*Corresponding author: Toru Hosoi, Hiroshima university*

---

### Review timeline:

Submission date:

25 June 2013

Accepted:

21 November 2013

---

*Editor: Céline Carret*

### Transaction Report:

No Peer Review Process File is available with this article, as the authors have chosen not to make the review process public in this case.
