# Supplementary material for: Flurbiprofen ameliorated obesity by attenuating leptin resistance induced by endoplasmic reticulum stress
Source: PubMed Central journal article supplement (PMC3958308; doi:10.1002/emmm.201303227), 2014-01-14

**Fig. 5A**

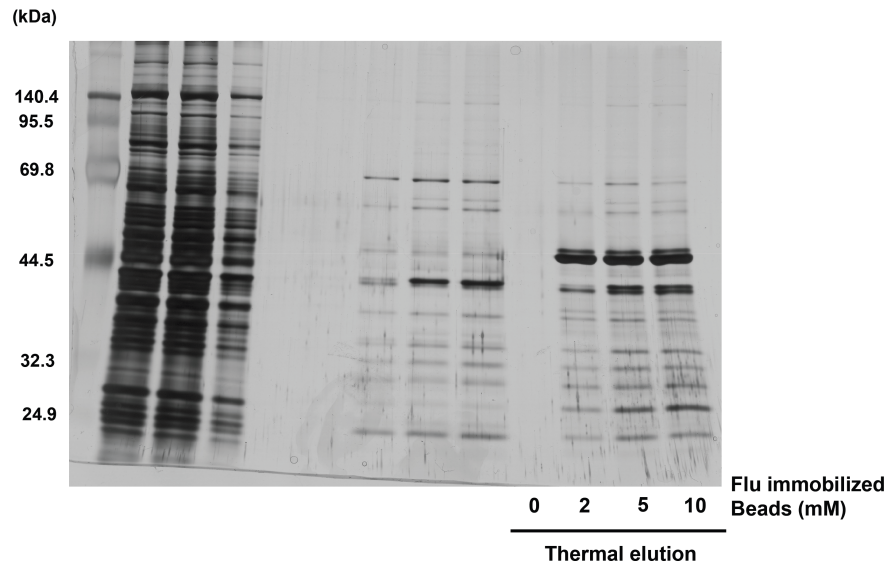

**Fig. 5C**

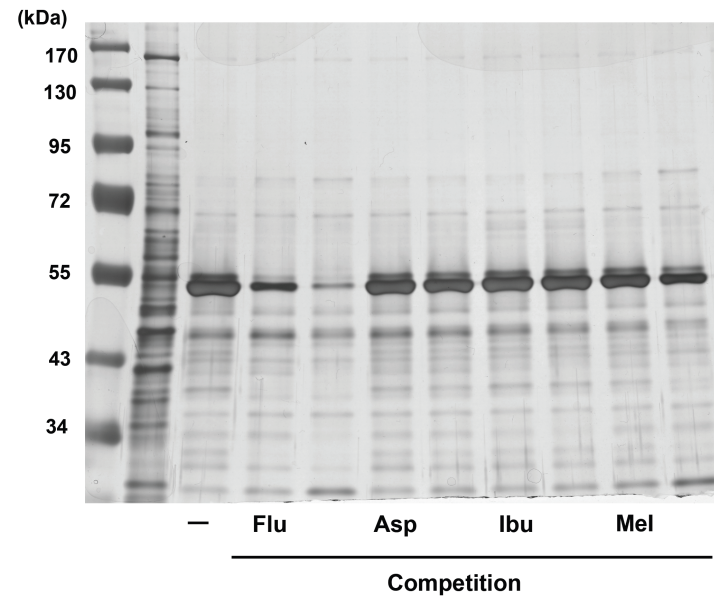

**Fig. 5B**

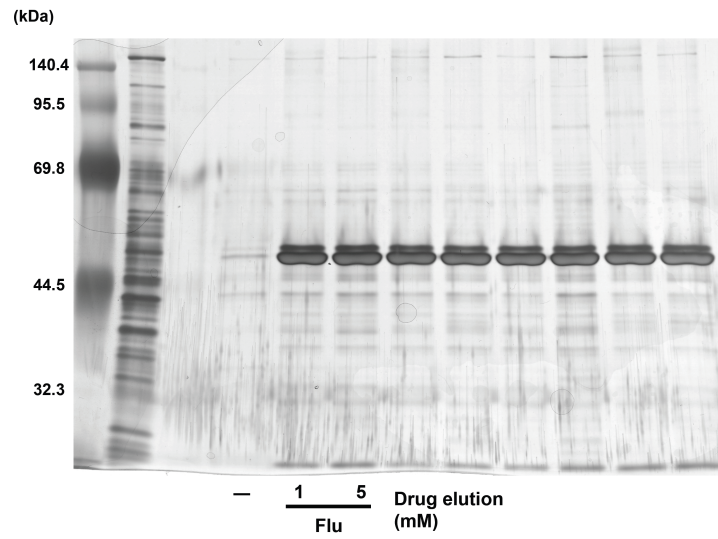

**Fig. 5D**

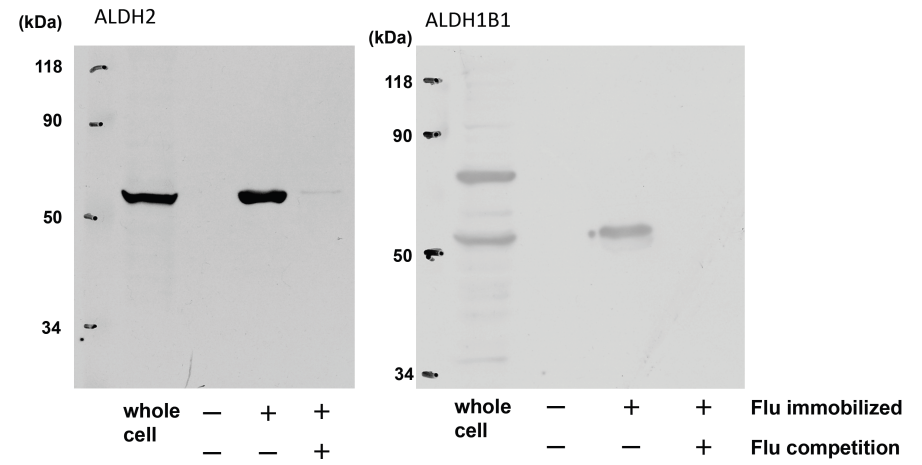

### Fig. 5E (ALDH2)

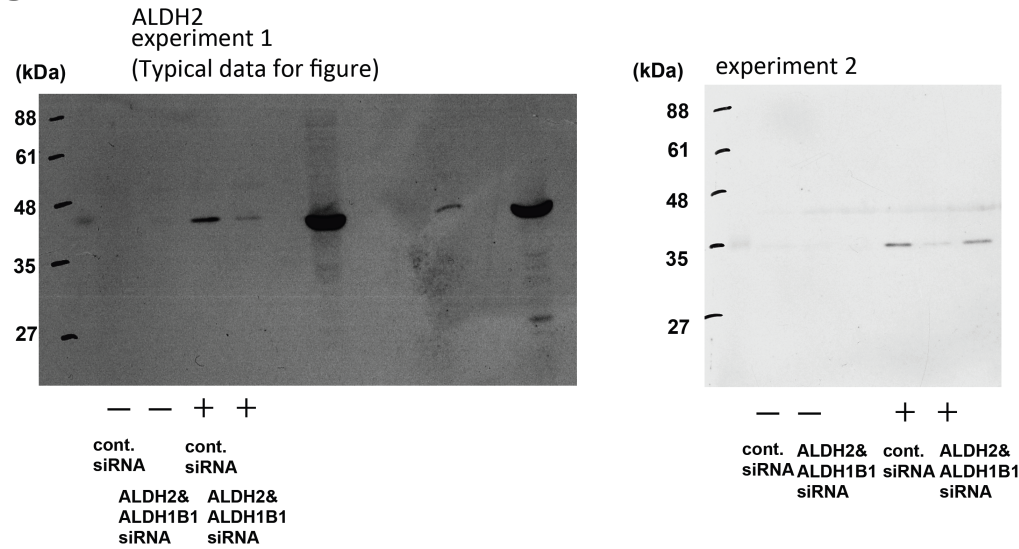

### Fig. 5E (ALDH1B1)

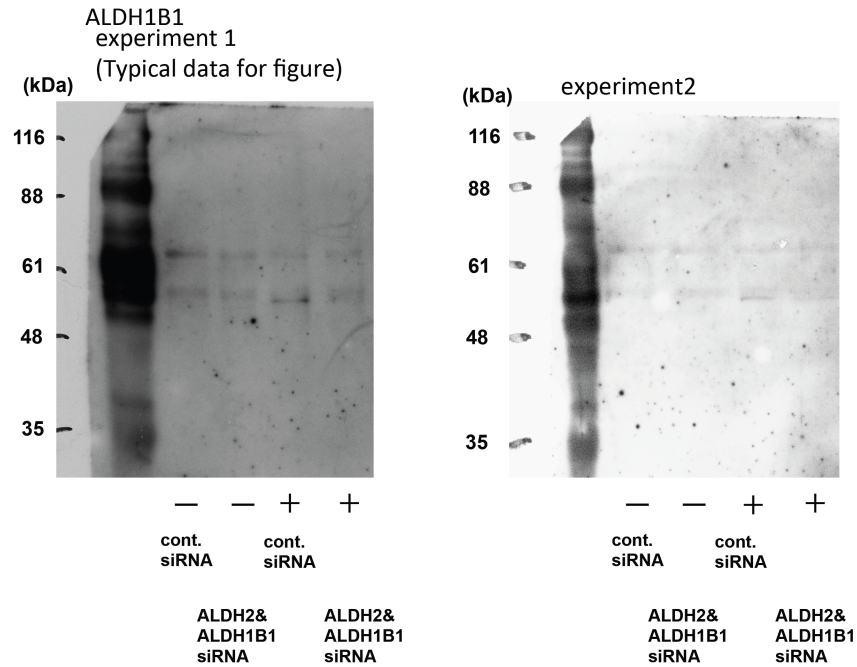

### Fig. 5F

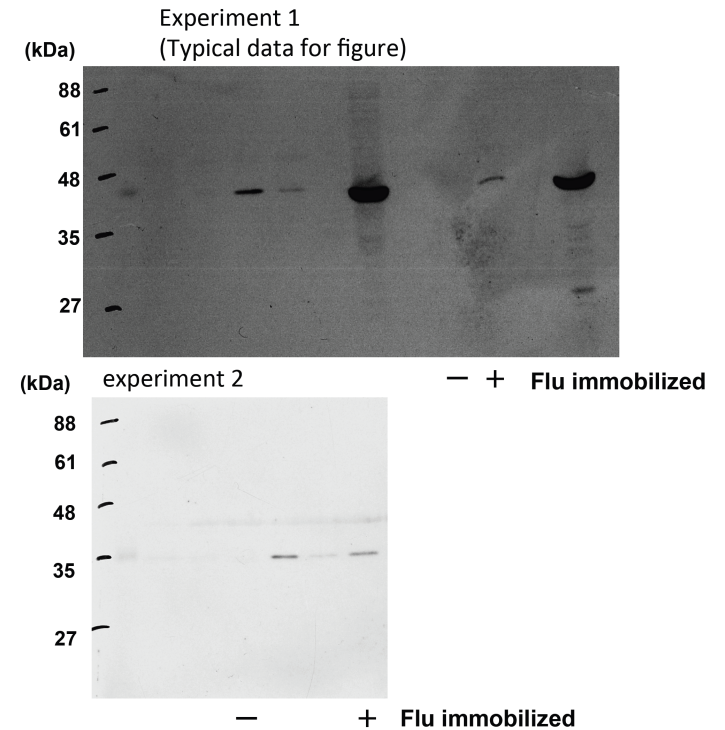

**Fig. 5G**

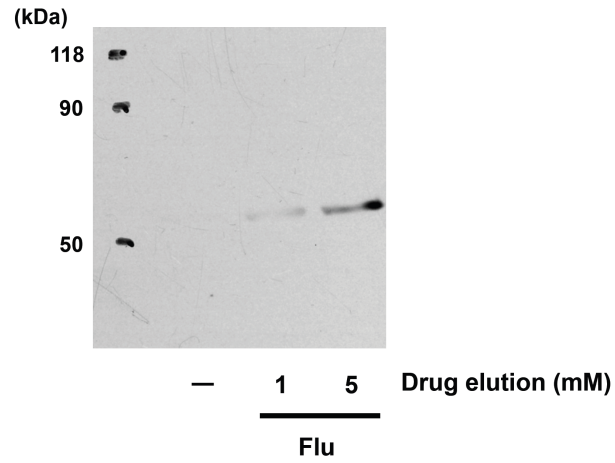

**Fig. 5I**

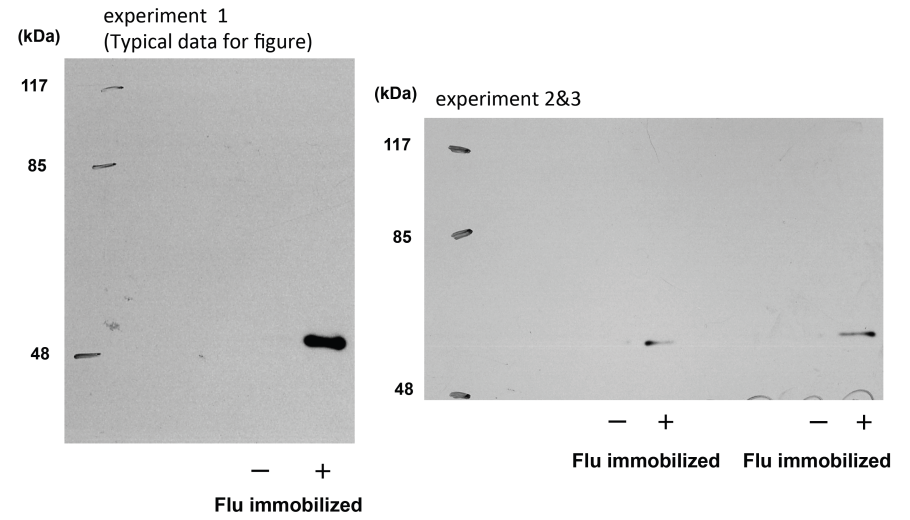

**Fig. 5H**

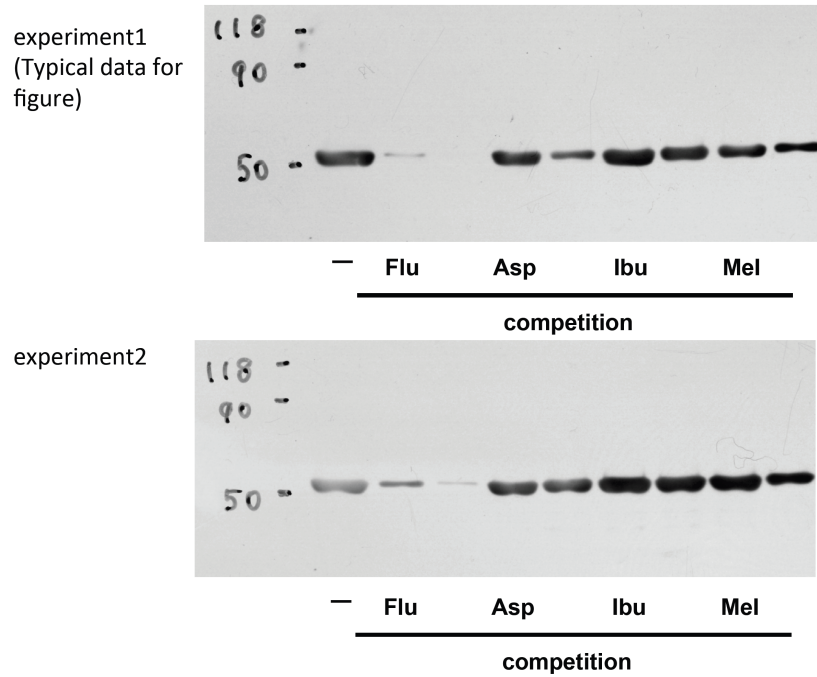

Supplement: emmm0006-0335-sd3.pdf [file emmm0006-0335-sd3.pdf]
