# Supplementary material for: Flurbiprofen ameliorated obesity by attenuating leptin resistance induced by endoplasmic reticulum stress
Source: PubMed Central journal article supplement (PMC3958308; doi:10.1002/emmm.201303227), 2014-01-14
Supplement: emmm0006-0335-sd4.pdf [file emmm0006-0335-sd4.pdf]

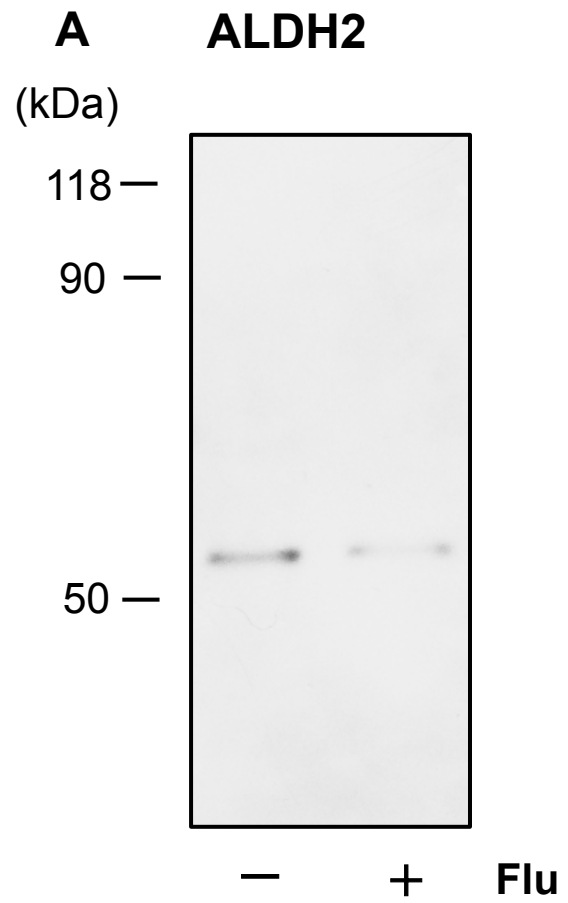

Fig.6
