# Supplementary material for: Flurbiprofen ameliorated obesity by attenuating leptin resistance induced by endoplasmic reticulum stress
Source: PubMed Central journal article supplement (PMC3958308; doi:10.1002/emmm.201303227), 2014-01-14

**Fig. 8A**

Experiment1 (Typical data for figure)

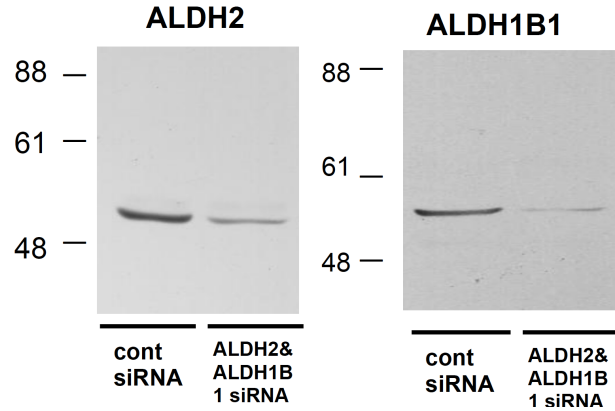

Experiment1 (Typical data for figure)

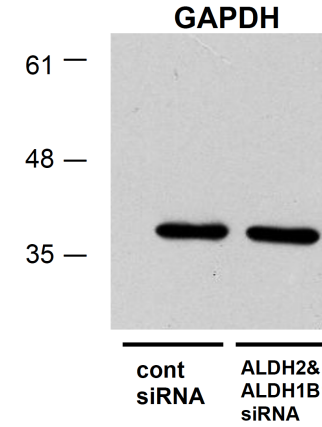

Experiment2

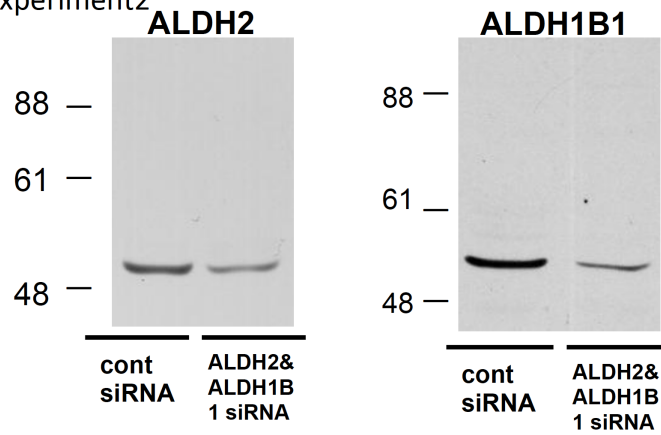

Experiment3

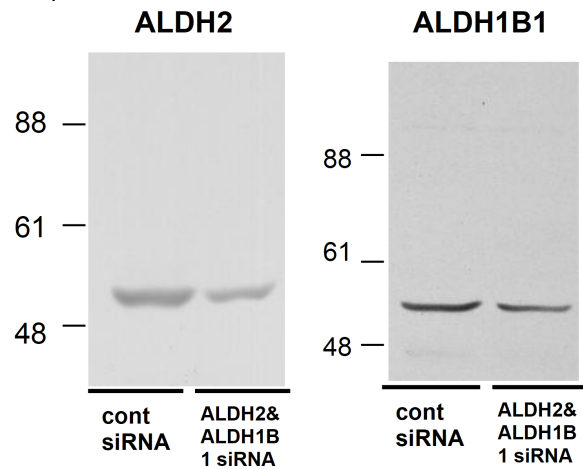

**Fig. 8B**

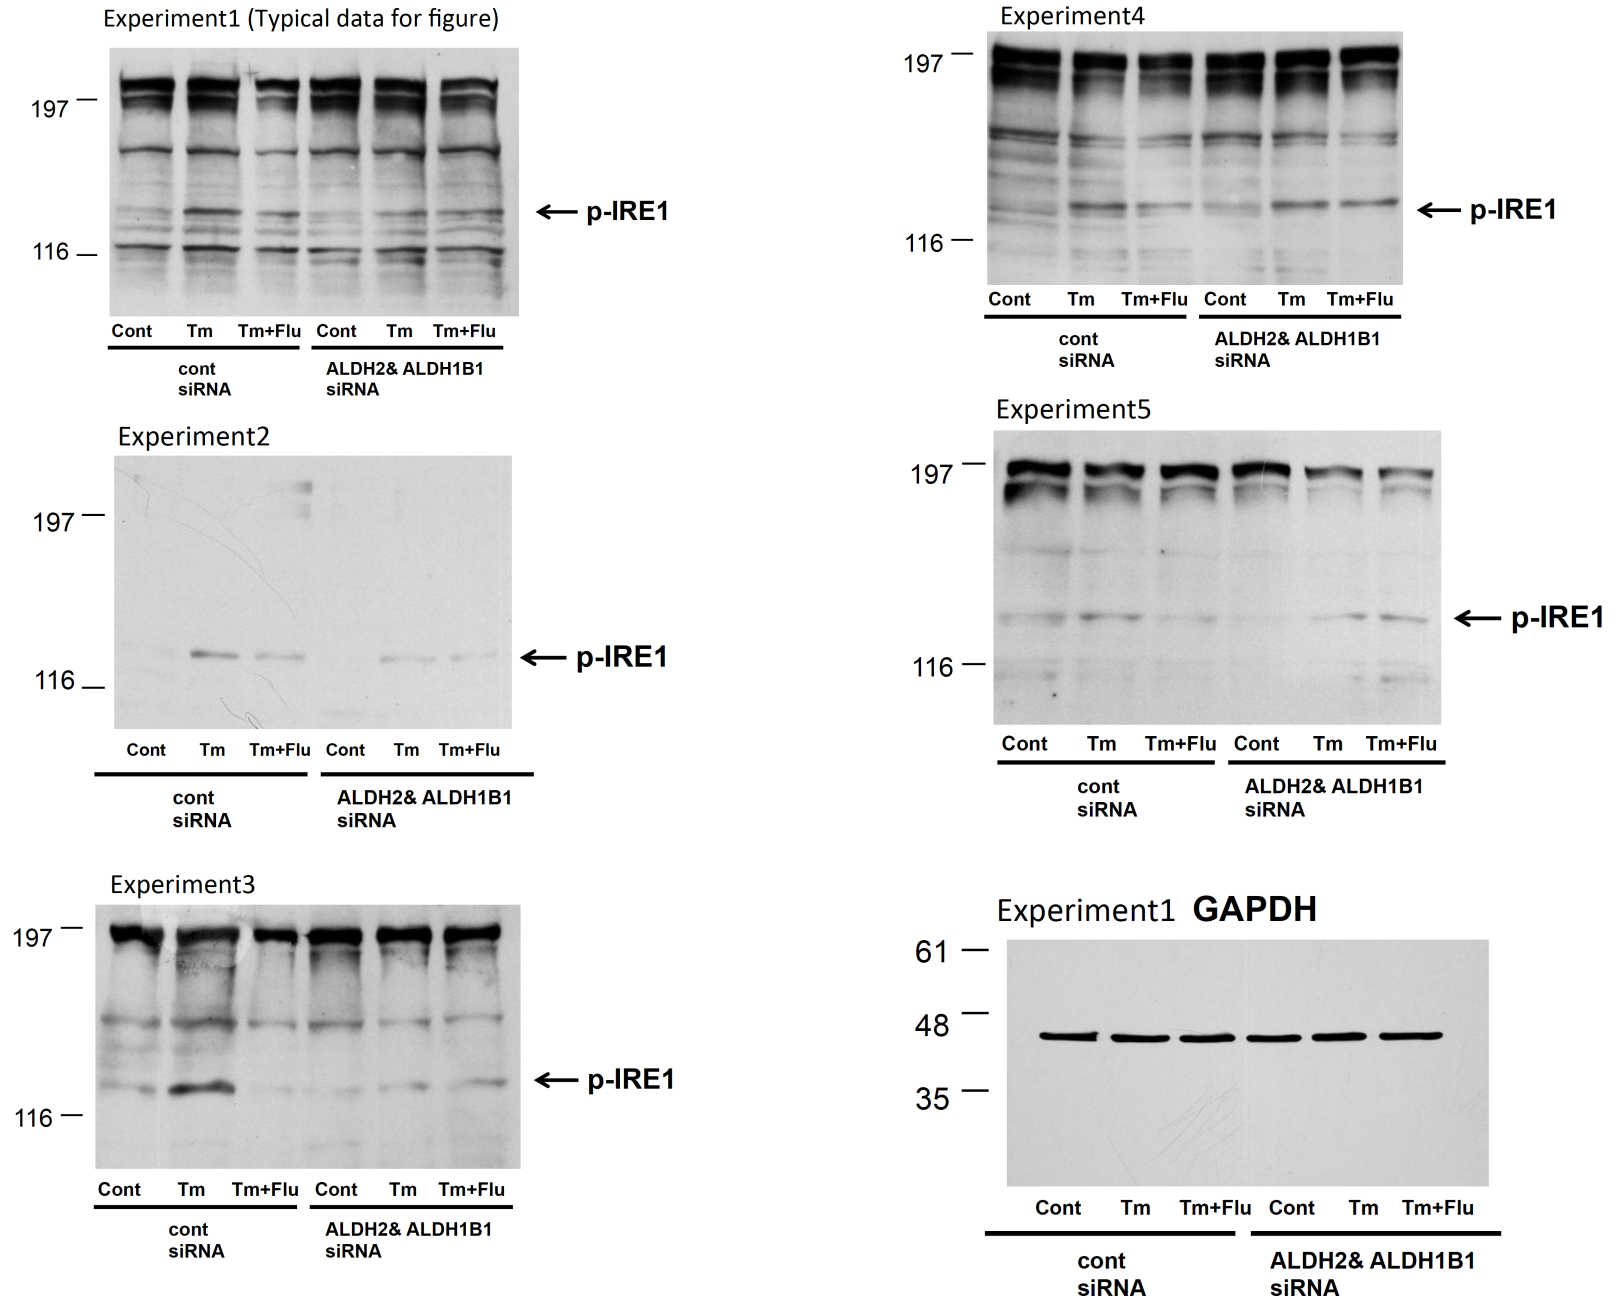

**Fig. 8C**

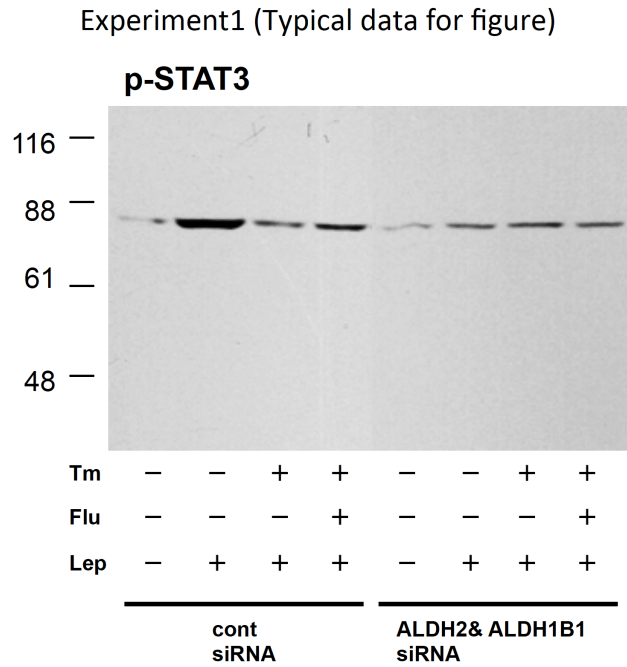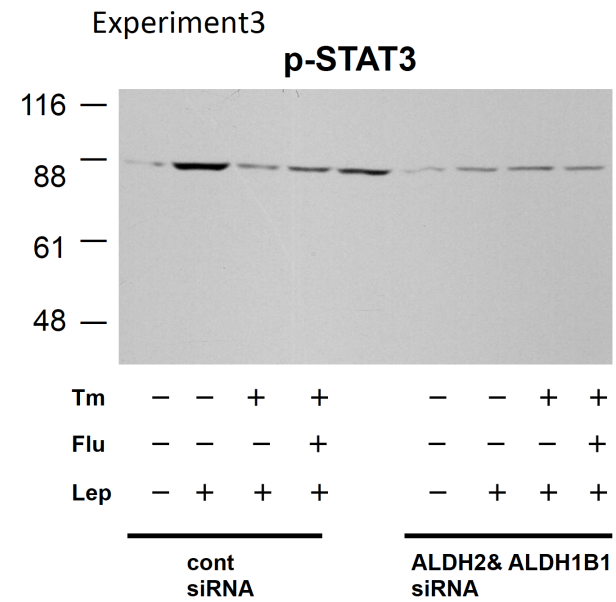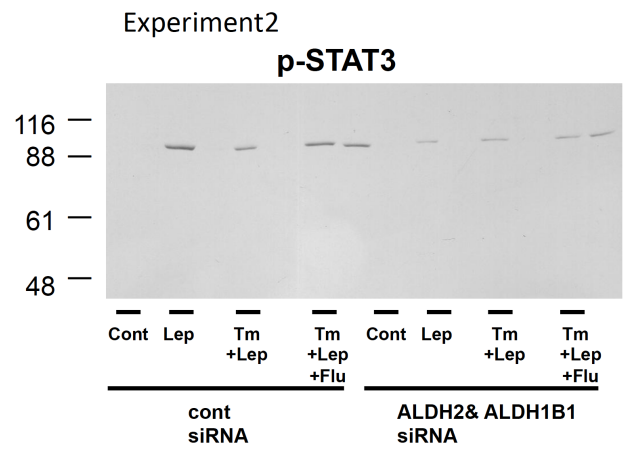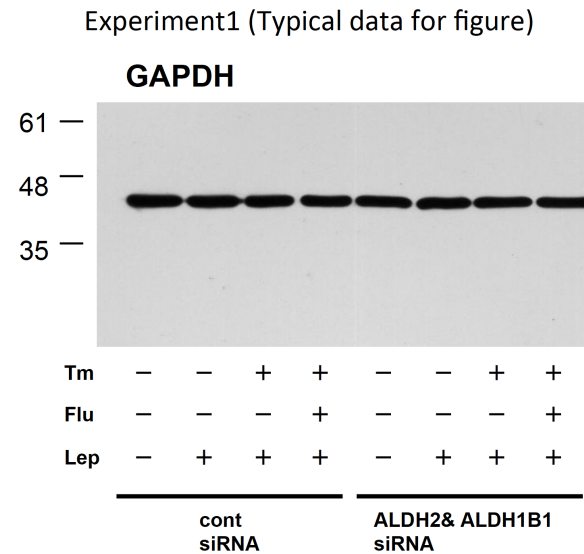

Supplement: emmm0006-0335-sd6.pdf [file emmm0006-0335-sd6.pdf]
