# Supplementary material for: Flurbiprofen ameliorated obesity by attenuating leptin resistance induced by endoplasmic reticulum stress
Source: PubMed Central journal article supplement (PMC3958308; doi:10.1002/emmm.201303227), 2014-01-14
Supplement: emmm0006-0335-sd7.pdf [file emmm0006-0335-sd7.pdf]

# Supporting Information

## **Flurbiprofen ameliorated obesity by attenuating leptin resistance induced by endoplasmic reticulum stress**

Toru Hosoi<sup>1</sup>, Rie Yamaguchi<sup>1</sup>, Kikuko Noji<sup>1</sup>, Suguru Matsuo<sup>1</sup>, Sachiko Baba<sup>1</sup>, Keisuke Toyoda<sup>1</sup>, Takahiro Suezawa<sup>1</sup>, Takaaki Kayano<sup>1</sup>, Shinpei Tanaka<sup>2</sup> and Koichiro Ozawa<sup>1</sup>

<sup>1</sup>Department of Pharmacotherapy, Graduate School of Biomedical and Health Sciences, Hiroshima University, 1-2-3 Kasumi, Minami-ku, Hiroshima 734-8553, Japan

<sup>2</sup>School of Integrated Arts & Sciences, Hiroshima University, 1-7-1 Kagamiyama, Higashi-Hiroshima 739-8521, Japan.

### **Table of contents:**

#### **Supplementary Figure. S1 (page 2)**

Flurbiprofen inhibited ER stress-induced cell death.

#### **Supplementary Figure. S2 (page 2)**

Circulating leptin levels were normalized by flurbiprofen treatment.

#### **Supplementary Figure. S3 (page 3)**

Effect of flurbiprofen on leptin-induced attenuation of food intake.

#### **Supplementary Figure. S4 (page 3)**

CT scan analysis of adipose tissue of flurbiprofen-treated mice.

#### **Supplementary Figure. S5 (page 4)**

Flurbiprofen did not influence mice locomotor activities.

#### **Supplementary Figure. S6 (page 4)**

Flurbiprofen did not affect body length.

#### **Supplementary Figure. S7 (page 5)**

Preparation of flurbiprofen-immobilized beads.

#### **Supplementary Figure. S8 (page 5)**

Flurbiprofen-bound proteins were analyzed in other tissue lysates.

#### **Supplementary Figure. S9 (page 6)**

ER stress-induced cell death was enhanced by knocking down ALDH2 and ALDH1B1.

#### **Supplementary Figure. S10 (page 6)**

Heat-induced aggregation of lysozymes was measured with or without arginine (Arg).
