# Supplementary material for: Flurbiprofen ameliorated obesity by attenuating leptin resistance induced by endoplasmic reticulum stress
Source: PubMed Central journal article supplement (PMC3958308; doi:10.1002/emmm.201303227), 2014-01-14
Supplement: emmm0006-0335-sd8.pdf [file emmm0006-0335-sd8.pdf]

## Supplemental figures

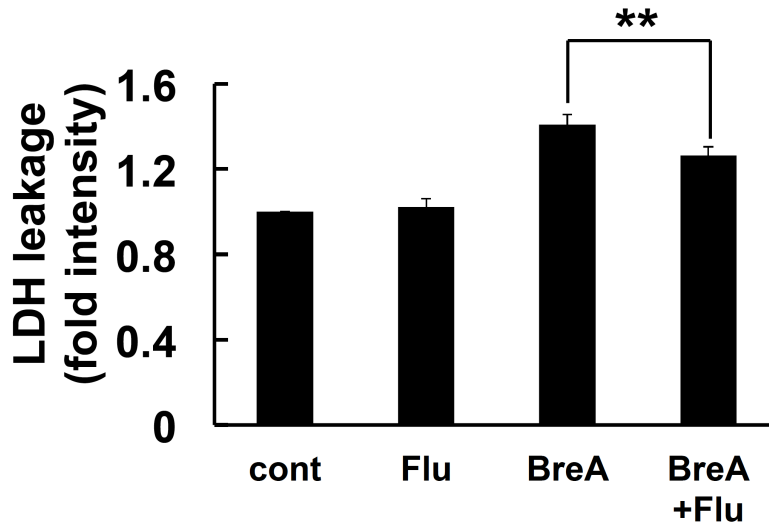

**Fig. S1 Flurbiprofen inhibited ER stress-induced cell death.**

SH-SY5Y cells were treated with brefeldin A (30 ng/mL) in the presence or absence of flurbiprofen (Flu) for 48 h. LDH activity was then measured as an indicator of cytotoxicity.  $**P < 0.01$   $n=8$ .

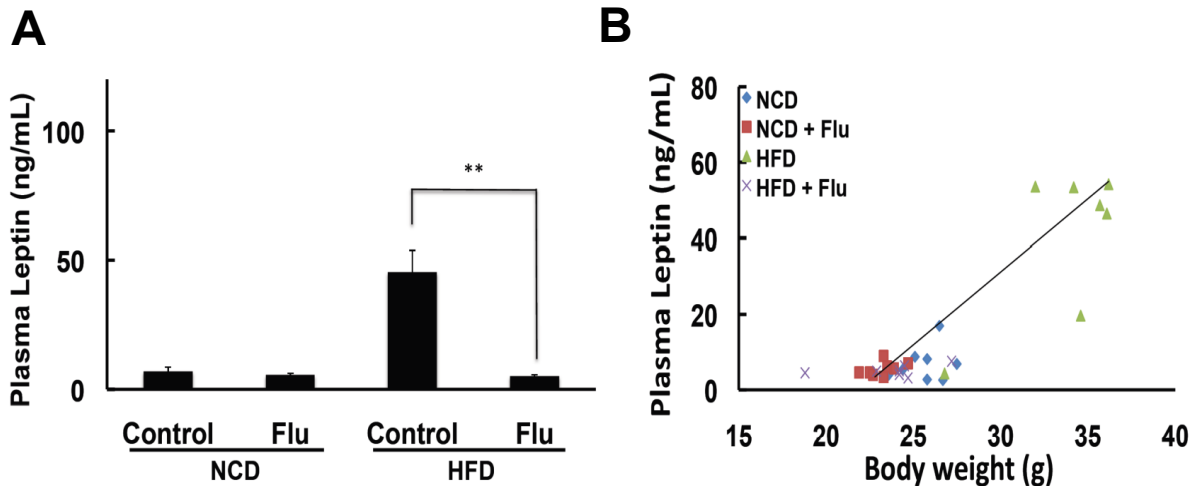

**Fig. S2 Circulating leptin levels were normalized by flurbiprofen treatment**

(A) Flurbiprofen inhibited the high-fat diet (HFD)-induced elevation of circulating leptin levels in fasted mice. Mice were fed a normal chow diet (NCD) or high-fat diet (HFD) with or without flurbiprofen (Flu) for 8 weeks. Plasma leptin levels were measured 17 h after fasting. We observed that flurbiprofen can reduce plasma leptin levels even in a fasted mice.  $n = 7 \sim 8$  per group.  $***P < 0.001$  v.s. high-fat diet. (B) Leptin levels were positively correlated with body weight.
