# Supplementary material for: Flurbiprofen ameliorated obesity by attenuating leptin resistance induced by endoplasmic reticulum stress
Source: PubMed Central journal article supplement (PMC3958308; doi:10.1002/emmm.201303227), 2014-01-14
Supplement: emmm0006-0335-sd10.pdf [file emmm0006-0335-sd10.pdf]

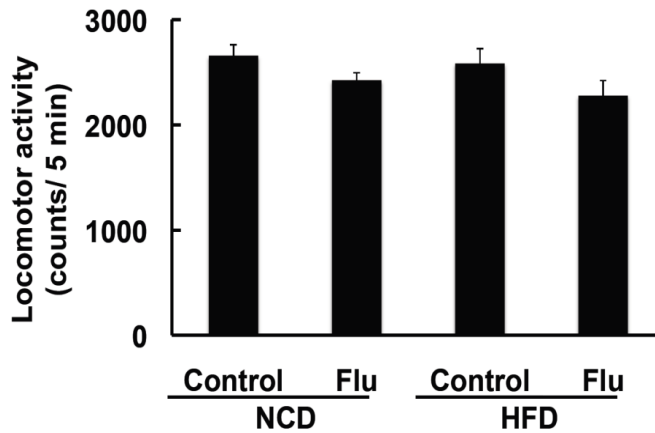

**Fig. S5 Flurbiprofen did not influence mice locomotor activities.**

Open field tests were used to measure locomotor activity. Total activity in 5 minutes was roughly the same among mice. n = 15-16 per group.

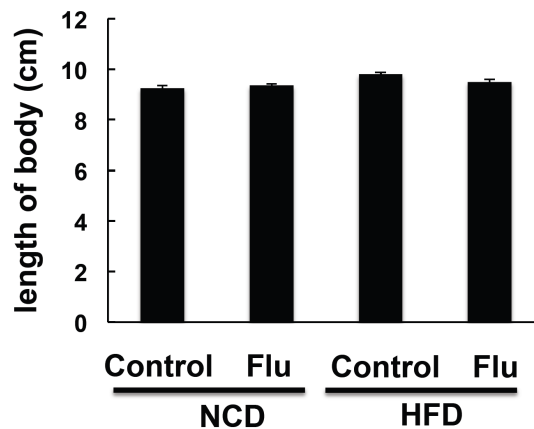

**Fig.S6 Fulrbiprofen did not affect body length.**

Mice were fed a normal chow diet (NCD) or high fat diet (HFD) concomitantly with or without flurbiprofen (Flu) for 8 weeks. Body length was measured 8 weeks after the treatments in each mouse. We measured body lengths from the nose to the beginning of the tail. n = 7-8 per group.
