# Supplementary material for: Flurbiprofen ameliorated obesity by attenuating leptin resistance induced by endoplasmic reticulum stress
Source: PubMed Central journal article supplement (PMC3958308; doi:10.1002/emmm.201303227), 2014-01-14
Supplement: emmm0006-0335-sd11.pdf [file emmm0006-0335-sd11.pdf]

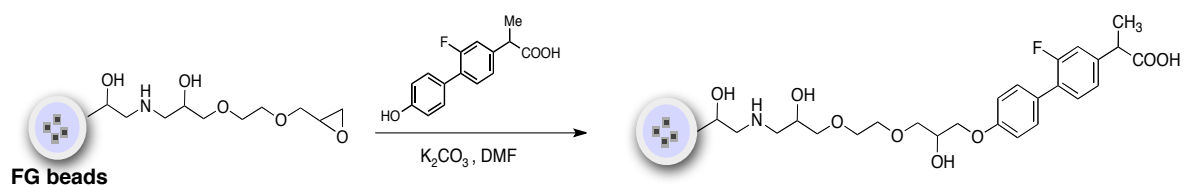

**Fig. S7 Preparation of flurbiprofen-immobilized beads.**

FG beads were incubated with 4'-hydroxy flurbiprofen and  $K_2CO_3$  in DMF for 24 h at 60 °C.

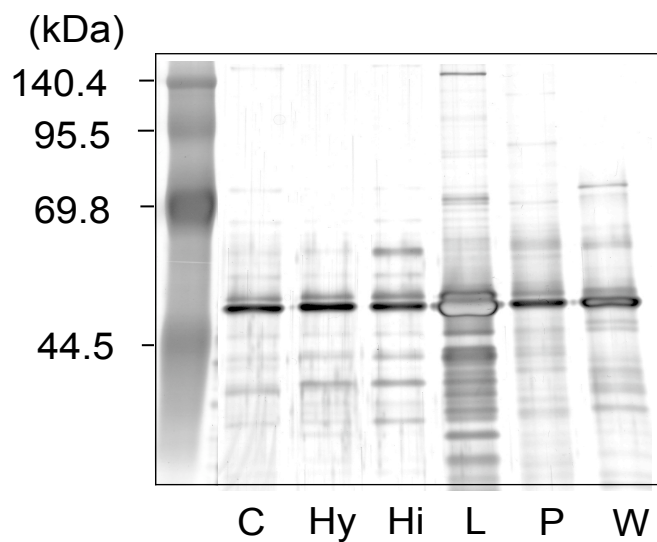

**Fig. S8 Flurbiprofen-bound proteins were analyzed in other tissue lysates.**

C: cerebral cortex, Hy: hypothalamus, Hi: hippocampus, L: liver, P: pancreas, W: white adipocyte.
