# Supplementary material for: Flurbiprofen ameliorated obesity by attenuating leptin resistance induced by endoplasmic reticulum stress
Source: PubMed Central journal article supplement (PMC3958308; doi:10.1002/emmm.201303227), 2014-01-14
Supplement: emmm0006-0335-sd12.pdf [file emmm0006-0335-sd12.pdf]

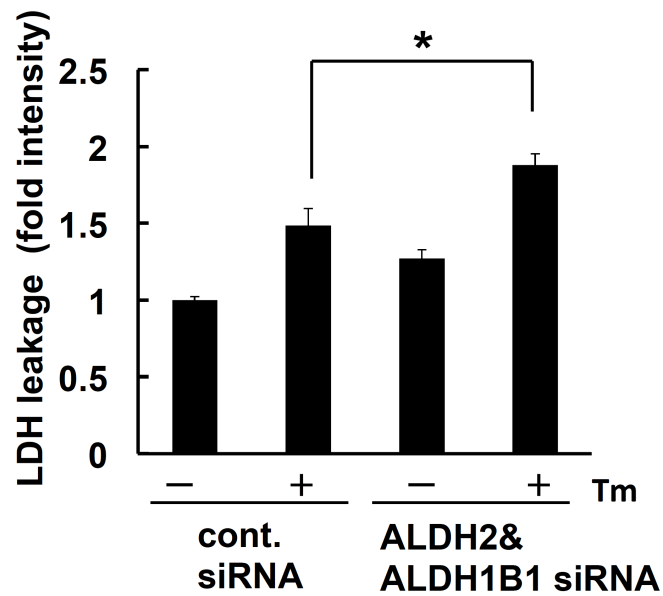

**Fig. S9 ER stress-induced cell death was enhanced by knocking down ALDH2 and ALDH1B1.**

SH-SY5Y cells were treated with tunicamycin (Tm: 1 $\mu$ g/ mL) for 24 h and LDH activity was measured as an indicator of cytotoxicity. \* $P < 0.05$ ,  $n = 4$ . We knocked down ALDH2 and ALDH1B1 using the following siRNA sequences: human ALDH2: 5'-CUC UAU GUG GCC AAC CUG AdTdT-3'; human ALDH1B1: 5'-GGC UUA AGG CCU ACA CAG AdTdT-3'.

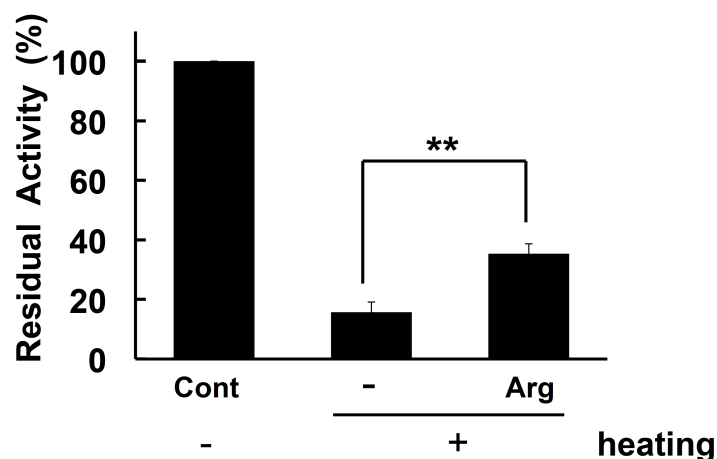

**Fig. S10 Heat-induced aggregation of lysozymes was measured with or without arginine (Arg).**

Arginine inhibited the heat-induced aggregation of lysozymes.
